# Supplementary material for: Bacterial pathogens deliver water- and solute-permeable channels to plant cells
Source: Springer Nature journal article supplement (doi:10.1038/s41586-023-06531-5), 2023-09-13

---

## Supplementary information

---

# Bacterial pathogens deliver water- and solute-permeable channels to plant cells

---

In the format provided by the  
authors and unedited

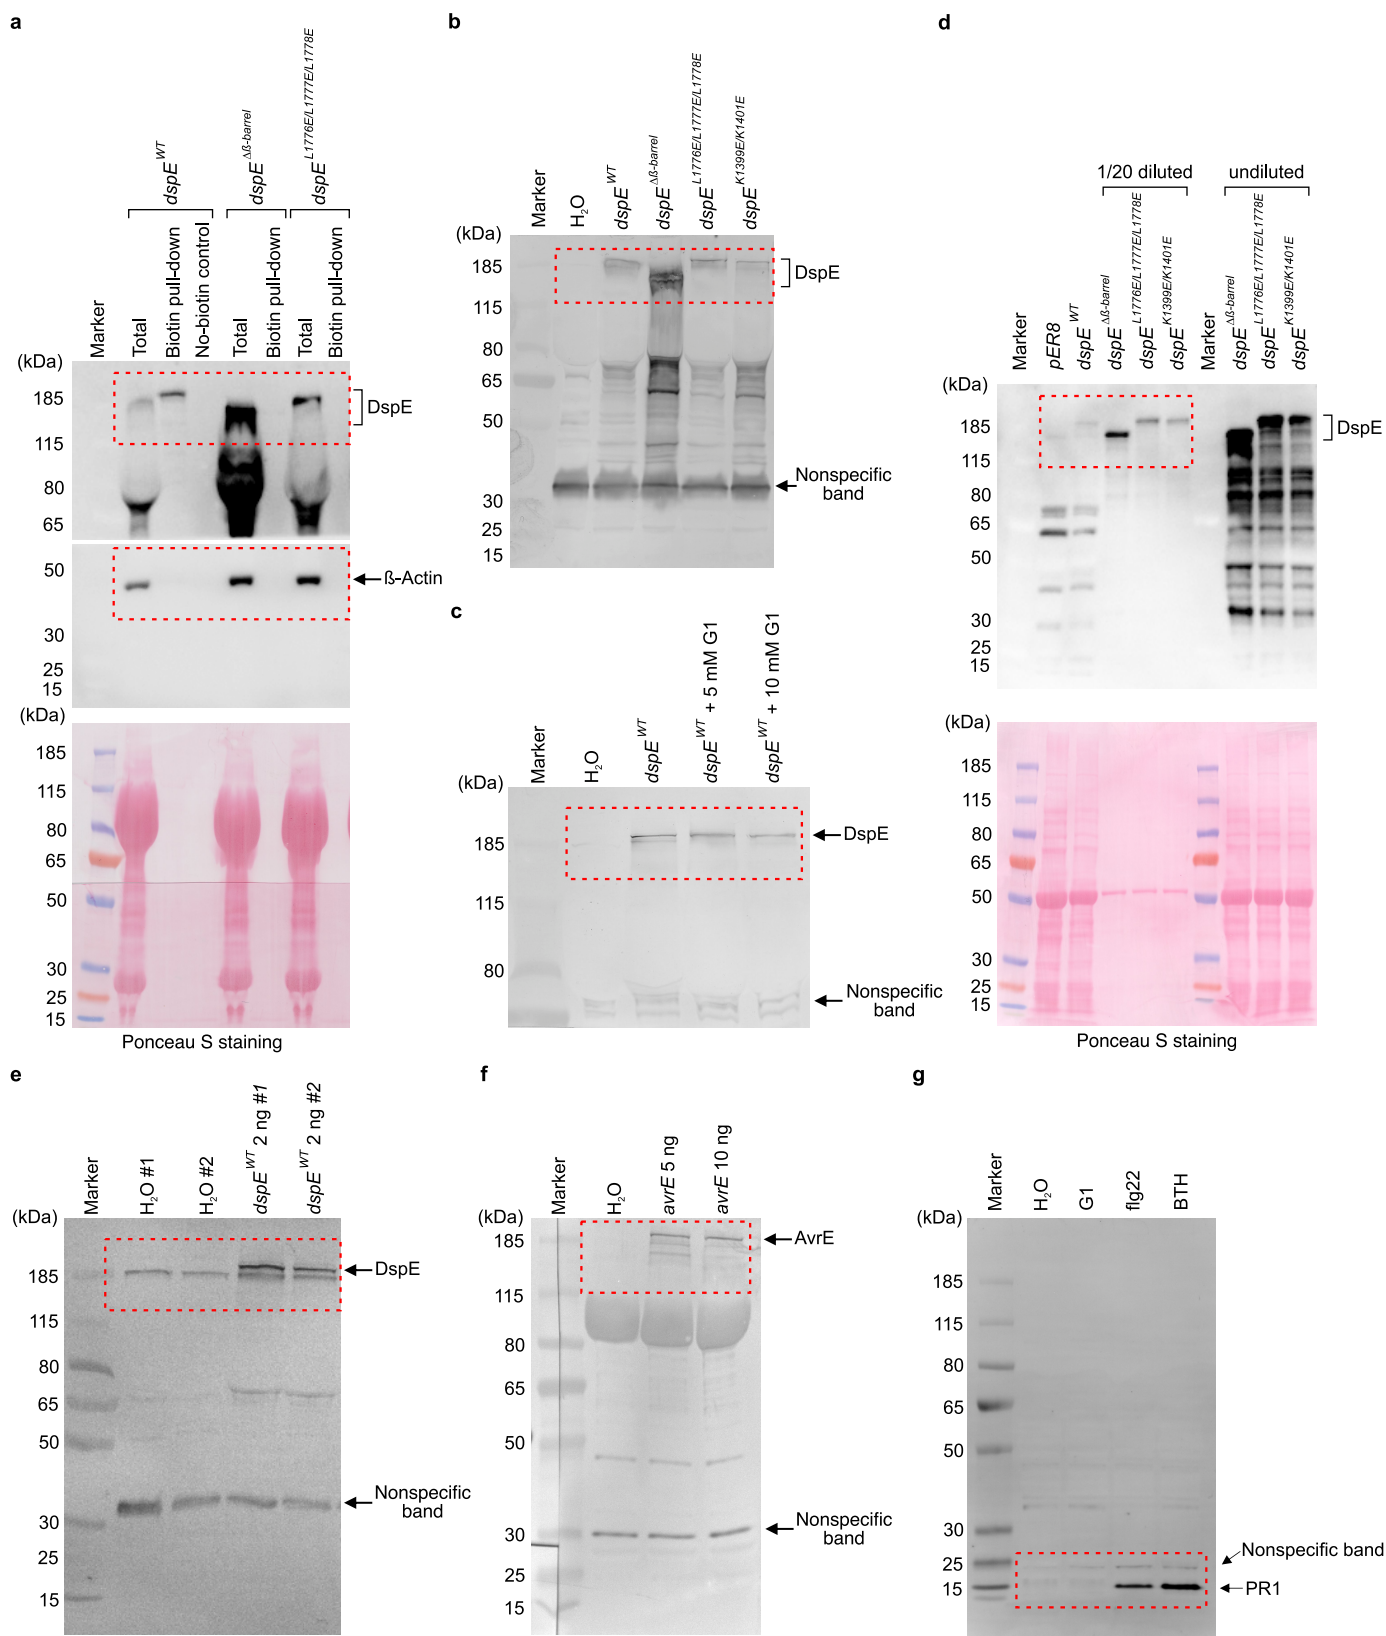

**h**

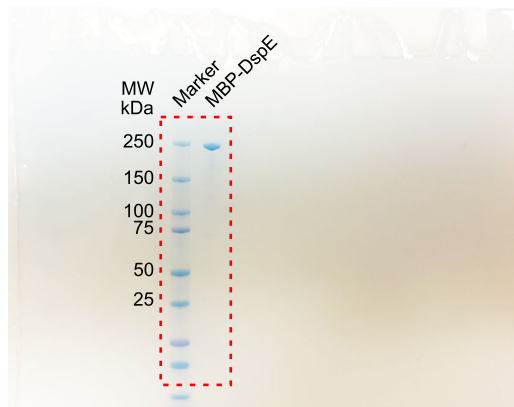

**i**

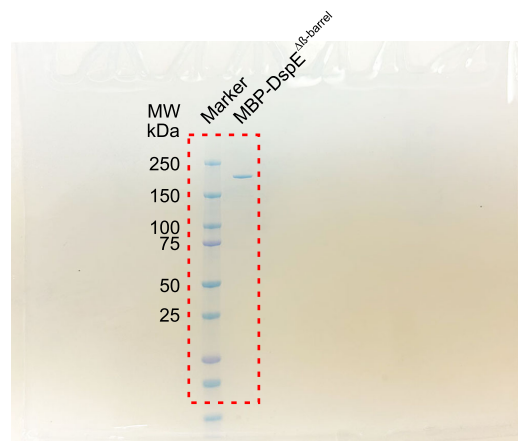

Supplement: MOESM1 [file 41586_2023_6531_MOESM1_ESM.pdf]
